# Supplementary material for: Vanadium Complexes Derived from O,N,O-tridentate 6-bis(o-hydroxyalkyl/aryl)pyridines: Structural Studies and Use in the Ring-Opening Polymerization of ε-Caprolactone and Ethylene Polymerization
Source: MDPI journal article supplement (doi:10.3390/catal13060988), 2023-06-09
Supplement: s1 [file s1]

## Supplementary Information

# Vanadium Complexes Derived from *O,N,O*-tridentate 6-bis(*o*-hydroxy-alkyl/aryl)pyridines: Structural Studies and Use in the Ring-Opening Polymerization of $\epsilon$ -Caprolactone and Ethylene Polymerization

Mark R. J. Elsegood <sup>1</sup>, William Clegg <sup>2</sup> and Carl Redshaw <sup>3,\*</sup>

<sup>1</sup> Chemistry Department, Loughborough University, Loughborough, LE11 3TU, UK; m.r.j.elsegood@lboro.ac.uk

<sup>2</sup> Chemistry, School of Natural & Environmental Sciences, Newcastle University, Newcastle upon Tyne NE1 7RU, UK; bill.clegg@ncl.ac.uk

<sup>3</sup> Plastics Collaboratory, Chemistry, School of Natural Sciences, University of Hull, Cottingham Road, Hull HU6 7RX, UK

\* Correspondence: c.redshaw@hull.ac.uk

## Contents:

**Figure S1.** Molecular structure of  $L^1H_2$

**Figure S2.** Intermolecular interaction and packing of  $L^1H_2$

**Figure S3.** Alternative view of the molecular structure of  $V(\{OC(Ph)_2CH_2\}_2(trans-NC_5H_3))_2 \cdot 2THF$  ( $3 \cdot 2THF$ ).

**Figure S4.** Example  $^{51}V$  NMR spectra (105.1 MHz in  $C_6D_6$ , 298K). Left of **4**; right of **6**.

**Figure S5.** Packing of **6**.

**Table S1.** Crystallographic data for **1**, **2** and  $3 \cdot 2THF$ .

**Table S2.** Crystallographic data for **4** – **6** and  $L^1H_2$ .

**Figure S6.** MALDI-ToF spectrum of PCL using **5** under  $N_2$  at 70 °C (entry 14, Table 1).

**Figure S7.**  $^1H$  NMR spectrum of PCL (using **1** in air, entry 5, Table 1).

**Figure S8.** MALDI-ToF spectrum of PCL using **1** under air (entry 5, Table 1).

**Figure S9.** MALDI-ToF spectrum of PCL using **5** as a melt under  $N_2$  (entry 7, Table 2).

**Figure S10.**  $^1H$  NMR spectrum of PVL (using **4** under  $N_2$ , entry 6, Table 3).

**Figure S11.** MALDI-ToF spectrum of PVL using **5** as a melt under  $N_2$  (entry 8, Table 3).

**Figure S12.** MALDI-ToF spectrum of PVL using **5** as a melt under air (entry 9, Table 3).

**Figure S13.**  $^{13}C$  NMR spectrum of methine region of PLA using **6** under  $N_2$  (entry 9, Table 4).

**Figure S14.**  $^{13}C$  NMR spectrum of methine region of PLA using **6** under air (entry 10, Table 4).

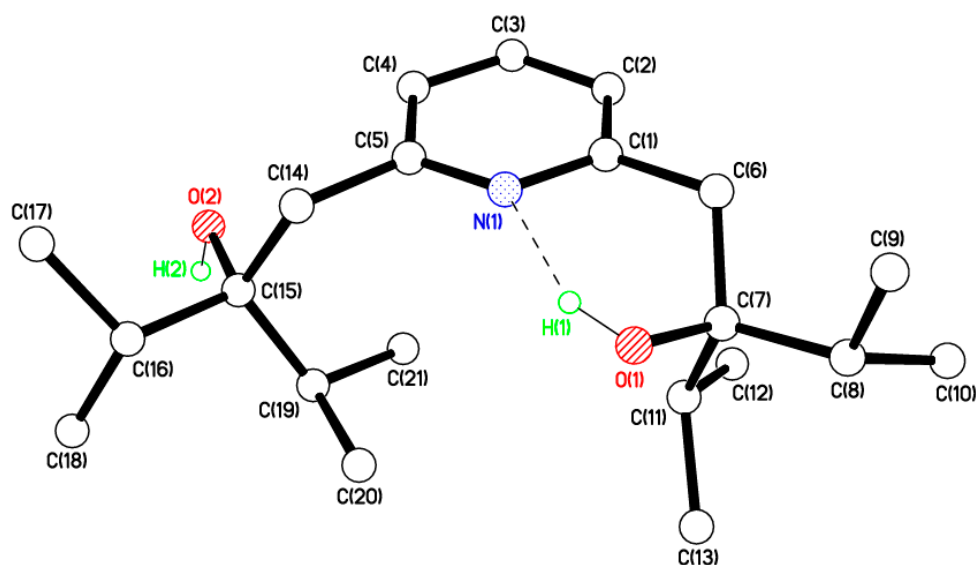

**Figure S1.** Molecular structure of  $L^1H_2$ . There is one molecule in the asymmetric unit.

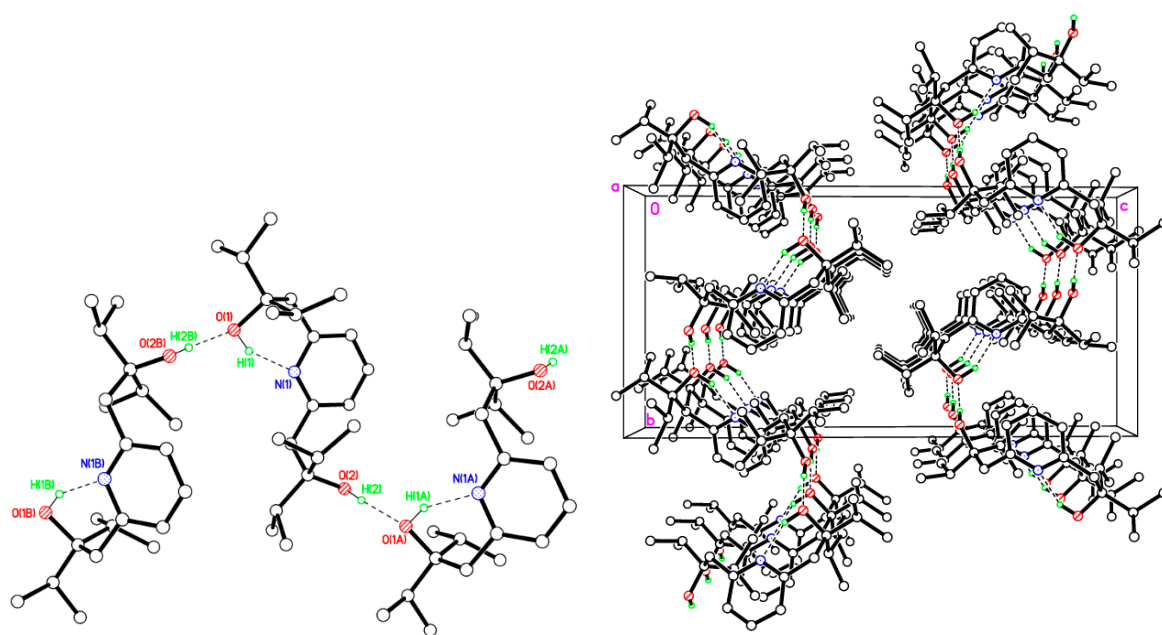

**Figure S2.** Intermolecular interaction and packing of  $L^1H_2$ . Intramolecular O–H $\cdots$ N H-bond from one hydroxyl group {at O(1)} to the pyridyl nitrogen with an S(6) motif. The other hydroxyl, at O(2), forms an intermolecular H-bond to a hydroxyl oxygen of the first type on a neighbouring molecule in the *b* direction with a C(8) motif.

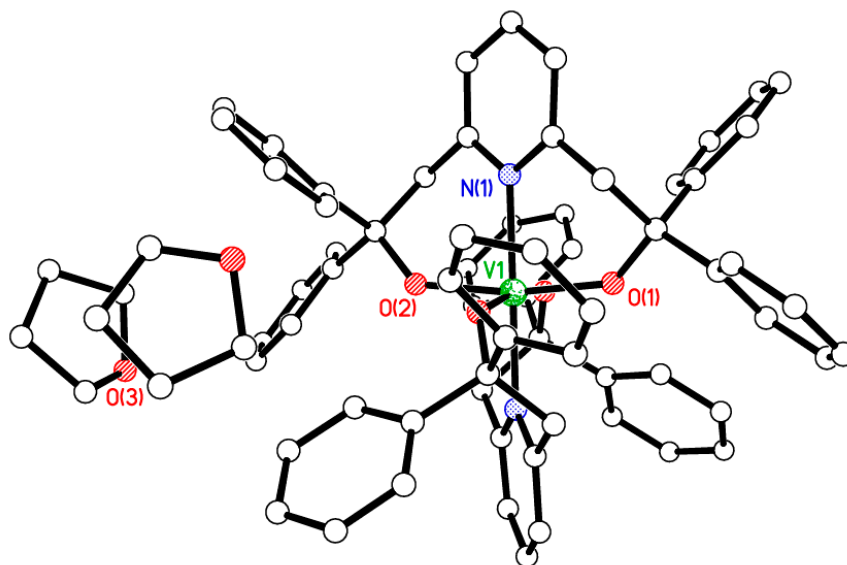

**Figure S3.** Alternative view of the molecular structure of  $[V(\{OC(Ph)_2CH_2\}_2(trans-NC_5H_3))_2] \cdot 2THF$  (**3**·2THF).

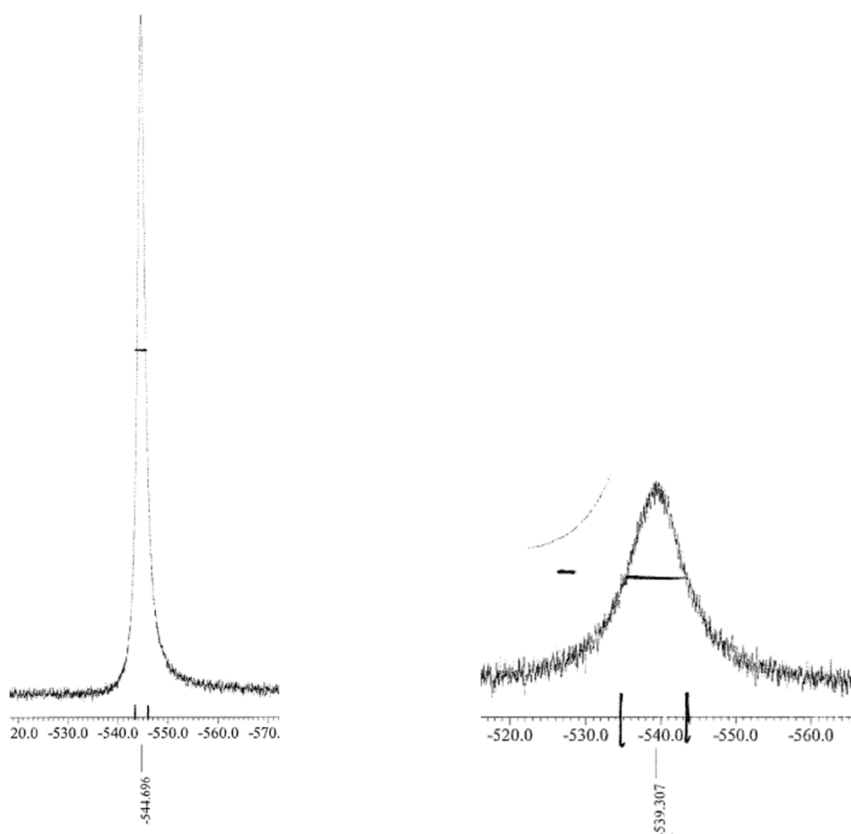

**Figure S4.** Example  $^{51}V$  NMR spectra (105.1 MHz in  $C_6D_6$ , 298K). Left of **4**; right of **6**.

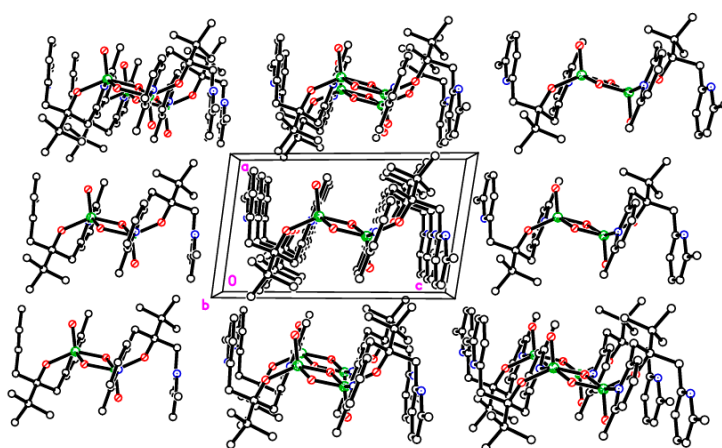

**Figure S5.** Packing in **6**.

### X-ray Crystallography.

Diffraction data were collected on CCD or pixel array detector-equipped diffractometers using rotating anode or sealed tube (for **3**) X-ray sources. Data were corrected for absorption, polarisation and Lp effects. All of the structures were solved and refined routinely. [1,2] H atoms were included in a riding model except the *OH* in *L*<sup>1</sup>H<sub>2</sub> which was freely refined. CCDC 2239107–2239113 contain the supplementary crystallographic data for this paper. These data can be obtained free of charge from The Cambridge Crystallographic Data Centre via [www.ccdc.cam.ac.uk/structures](http://www.ccdc.cam.ac.uk/structures).

**Table S1.** Crystallographic data for **1**, **2** and **3·2THF**.

| Compound             | <b>1</b>                                          | <b>2</b>                                                        | <b>3·2THF</b>                                                   |
|----------------------|---------------------------------------------------|-----------------------------------------------------------------|-----------------------------------------------------------------|
| Formula              | C <sub>36</sub> H <sub>34</sub> NO <sub>4</sub> V | C <sub>66</sub> H <sub>54</sub> N <sub>2</sub> O <sub>4</sub> V | C <sub>74</sub> H <sub>70</sub> N <sub>2</sub> O <sub>6</sub> V |
| Formula weight       | 595.58                                            | 990.05                                                          | 1134.26                                                         |
| Crystal system       | Monoclinic                                        | Monoclinic                                                      | Monoclinic                                                      |
| Space group          | <i>P</i> 2 <sub>1</sub> / <i>n</i>                | <i>P</i> 2 <sub>1</sub> / <i>n</i>                              | <i>I</i> 2/ <i>a</i>                                            |
| Unit cell dimensions |                                                   |                                                                 |                                                                 |
| <i>a</i> (Å)         | 14.1682(6)                                        | 13.53275(12)                                                    | 19.534(2)                                                       |
| <i>b</i> (Å)         | 11.8251(4)                                        | 19.22120(15)                                                    | 15.4318(18)                                                     |
| <i>c</i> (Å)         | 18.9210(9)                                        | 19.65243(19)                                                    | 19.863(2)                                                       |
| <i>α</i> (°)         | 90                                                | 90                                                              | 90                                                              |
| <i>β</i> (°)         | 105.054(5)                                        | 96.6467(8)                                                      | 101.337(2)                                                      |
| <i>γ</i> (°)         | 90                                                | 90                                                              | 90                                                              |

|                                                                  |                 |                 |                 |
|------------------------------------------------------------------|-----------------|-----------------|-----------------|
| $V (\text{\AA}^3)$                                               | 3061.2(2)       | 5077.55(8)      | 5870.8(11)      |
| $Z$                                                              | 4               | 4               | 4               |
| Temperature<br>(K)                                               | 100(2)          | 100(2)          | 160(2)          |
| Wavelength<br>(\AA)                                              | 0.71073         | 1.54178         | 0.71073         |
| Calculated<br>density<br>(g.cm <sup>-3</sup> )                   | 1.292           | 1.295           | 1.283           |
| Absorption<br>coefficient<br>(mm <sup>-1</sup> )                 | 0.36            | 2.05            | 0.23            |
| Transmission<br>factors<br>(min./max.)                           | 0.458 and 1.000 | 0.900 and 1.000 | 0.841 and 0.897 |
| Crystal size<br>(mm <sup>3</sup> )                               | 0.11×0.09×0.01  | 0.07×0.04×0.04  | 0.25×0.24×0.12  |
| $\theta(\text{max}) (^\circ)$                                    | 29.6            | 70.4            | 28.5            |
| Reflections<br>measured                                          | 38147           | 91091           | 18019           |
| Unique<br>reflections                                            | 8501            | 9641            | 6711            |
| $R_{\text{int}}$                                                 | 0.112           | 0.042           | 0.045           |
| Reflections<br>with $F^2 > 2\sigma(F^2)$                         | 5759            | 8693            | 4534            |
| Number of<br>parameters                                          | 381             | 659             | 376             |
| $R_1 [F^2 > 2\sigma(F^2)]$                                       | 0.056           | 0.035           | 0.048           |
| $wR_2$ (all data)                                                | 0.143           | 0.092           | 0.120           |
| GOOF, $S$                                                        | 1.02            | 1.04            | 1.02            |
| Largest<br>difference<br>peak and hole<br>(e \AA <sup>-3</sup> ) | 0.68 and −0.64  | 0.30 and −0.57  | 0.33 and −0.42  |

**Table S2.** Crystallographic data for **4** – **6** and L<sup>1</sup>H<sub>2</sub>

| Compound                                                             | <b>4</b>                                          | <b>5</b>                                          | <b>6</b>                                                                     | L <sup>1</sup> H <sub>2</sub>                   |
|----------------------------------------------------------------------|---------------------------------------------------|---------------------------------------------------|------------------------------------------------------------------------------|-------------------------------------------------|
| Formula                                                              | C <sub>24</sub> H <sub>42</sub> NO <sub>4</sub> V | C <sub>24</sub> H <sub>42</sub> NO <sub>4</sub> V | C <sub>38</sub> H <sub>50</sub> N <sub>4</sub> O <sub>6</sub> V <sub>2</sub> | C <sub>21</sub> H <sub>37</sub> NO <sub>2</sub> |
| Formula weight                                                       | 459.52                                            | 459.52                                            | 760.70                                                                       | 335.51                                          |
| Crystal system                                                       | Monoclinic                                        | Orthorhombic                                      | Triclinic                                                                    | Monoclinic                                      |
| Space group                                                          | <i>P</i> 2 <sub>1</sub> / <i>n</i>                | <i>Pca</i> 2 <sub>1</sub>                         | <i>P</i> $\bar{1}$                                                           | <i>P</i> 2 <sub>1</sub> / <i>c</i>              |
| Unit cell dimensions                                                 |                                                   |                                                   |                                                                              |                                                 |
| <i>a</i> (Å)                                                         | 10.84157(10)                                      | 15.66703(12)                                      | 7.91377(17)                                                                  | 7.5267(2)                                       |
| <i>b</i> (Å)                                                         | 17.60523(18)                                      | 20.25108(14)                                      | 9.1860(3)                                                                    | 11.4467(3)                                      |
| <i>c</i> (Å)                                                         | 12.79976(12)                                      | 15.73473(11)                                      | 13.0852(3)                                                                   | 23.4237(6)                                      |
| $\alpha$ (°)                                                         | 90                                                | 90                                                | 83.710(2)                                                                    | 90                                              |
| $\beta$ (°)                                                          | 96.7571(9)                                        | 90                                                | 80.7205(18)                                                                  | 93.094(2)                                       |
| $\gamma$ (°)                                                         | 90                                                | 90                                                | 78.802(2)                                                                    | 90                                              |
| <i>V</i> (Å <sup>3</sup> )                                           | 2426.10(4)                                        | 4992.23(6)                                        | 917.91(4)                                                                    | 2015.15(9)                                      |
| <i>Z</i>                                                             | 4                                                 | 8                                                 | 1                                                                            | 4                                               |
| Temperature (K)                                                      | 100(2)                                            | 100(2)                                            | 100(2)                                                                       | 100(2)                                          |
| Wavelength (Å)                                                       | 1.54178                                           | 1.54178                                           | 1.54178                                                                      | 1.54178                                         |
| Calculated density (g.cm <sup>−3</sup> )                             | 1.258                                             | 1.223                                             | 1.376                                                                        | 1.106                                           |
| Absorption coefficient (mm <sup>−1</sup> )                           | 3.64                                              | 3.54                                              | 4.68                                                                         | 0.54                                            |
| Transmission factors (min./max.)                                     | 0.553 and 1.000                                   | 0.702 and 1.000                                   | 0.712 and 1.000                                                              | 0.922 and 0.986                                 |
| Crystal size (mm <sup>3</sup> )                                      | 0.30×0.18×0.03                                    | 0.24×0.14×0.02                                    | 0.12×0.08×0.02                                                               | 0.21×0.10×0.03                                  |
| $\theta$ (max) (°)                                                   | 70.1                                              | 68.2                                              | 68.2                                                                         | 76.8                                            |
| Reflections measured                                                 | 37710                                             | 52150                                             | 22171                                                                        | 19710                                           |
| Unique reflections                                                   | 4601                                              | 8652                                              | 3232                                                                         | 4047                                            |
| <i>R</i> <sub>int</sub>                                              | 0.048                                             | 0.031                                             | 0.025                                                                        | 0.048                                           |
| Reflections with <i>F</i> <sup>2</sup> > 2σ( <i>F</i> <sup>2</sup> ) | 4458                                              | 8347                                              | 3232                                                                         | 3343                                            |

|                                                          |                |                |                |                |
|----------------------------------------------------------|----------------|----------------|----------------|----------------|
| Number of parameters                                     | 281            | 561            | 231            | 233            |
| $R_1 [F^2 > 2\sigma(F^2)]$                               | 0.032          | 0.027          | 0.023          | 0.052          |
| $wR_2$ (all data)                                        | 0.089          | 0.075          | 0.066          | 0.152          |
| GOOF, $S$                                                | 1.06           | 1.10           | 1.08           | 1.05           |
| Largest difference peak and hole<br>(e Å <sup>-3</sup> ) | 0.45 and −0.43 | 0.17 and −0.32 | 0.31 and −0.32 | 0.32 and −0.23 |

## Ring opening polymerization

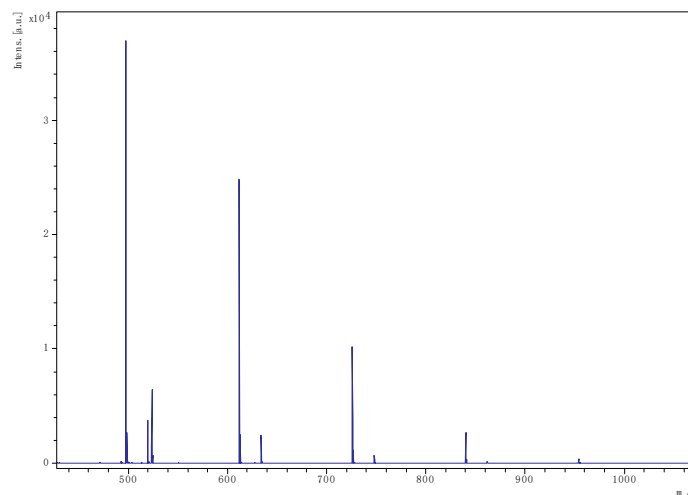

**Figure S6.** MALDI-ToF spectrum of PCL using **5** under N<sub>2</sub> at 70 °C (entry 14, Table 1). Present are a major family including chain oligomers terminated by 2 OH [ $M = 17 \text{ (OH)} + 1 \text{ (H)} + n \times 114.14 \text{ (CL)} + 22.99 \text{ (Na}^+)$ ] (e.g. peak 612 =  $(5 \times 114.14) + 23 + 18$ ; 726  $(6 \times 114.14) + 23 + 18$ ).

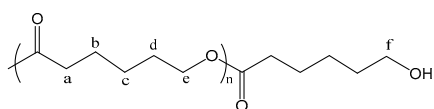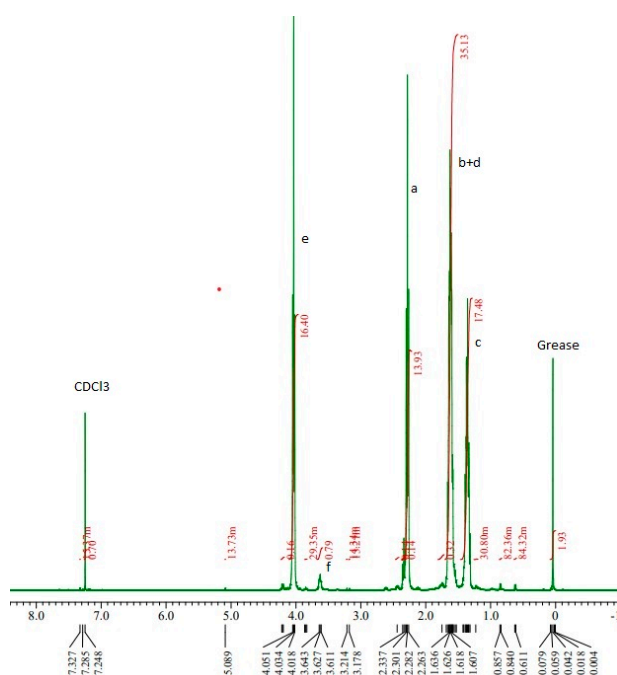

**Figure S7.** <sup>1</sup>H NMR spectrum of PCL (using **1** in air, entry 5, Table 1).

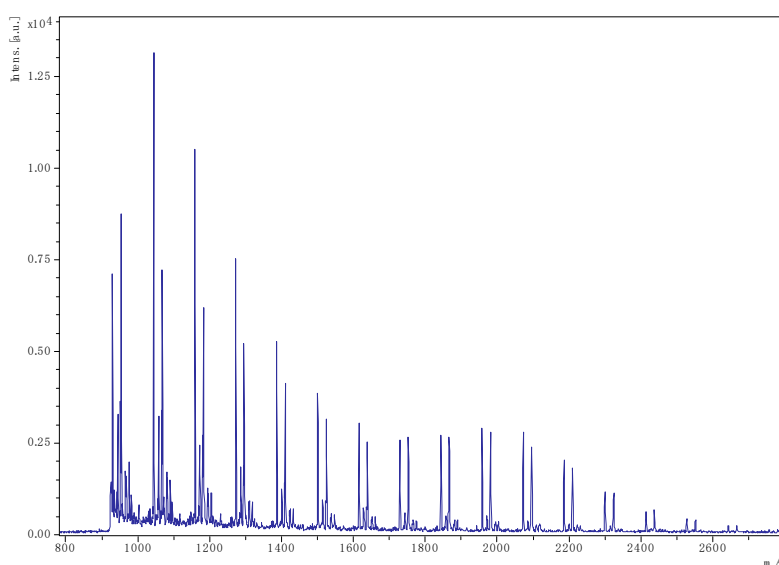

**Figure S8.** MALDI-ToF spectrum of PCL using **1** under air (entry 5, Table 1). Present are a number of families including chain polymers terminated by 2 OH [ $M = 17 \text{ (OH)} + 1 \text{ (H)} + n \times 114.14 \text{ (CL)} + 22.99 \text{ (Na}^+)$ ] (e.g. peak 1753 =  $(15 \times 114.14) + 23 + 18$ ), as well as by the pyridine phenol/phenolate and OH [ $M = 470.6 \text{ (C}_{33}\text{H}_{28}\text{NO}_2) + 1 \text{ (H)} + n \times 114.14 \text{ (CL)} + 22.99 \text{ (Na}^+)$ ] (e.g. peak 2207 =  $(15 \times 114.14) + 23 + 471.6$ ).

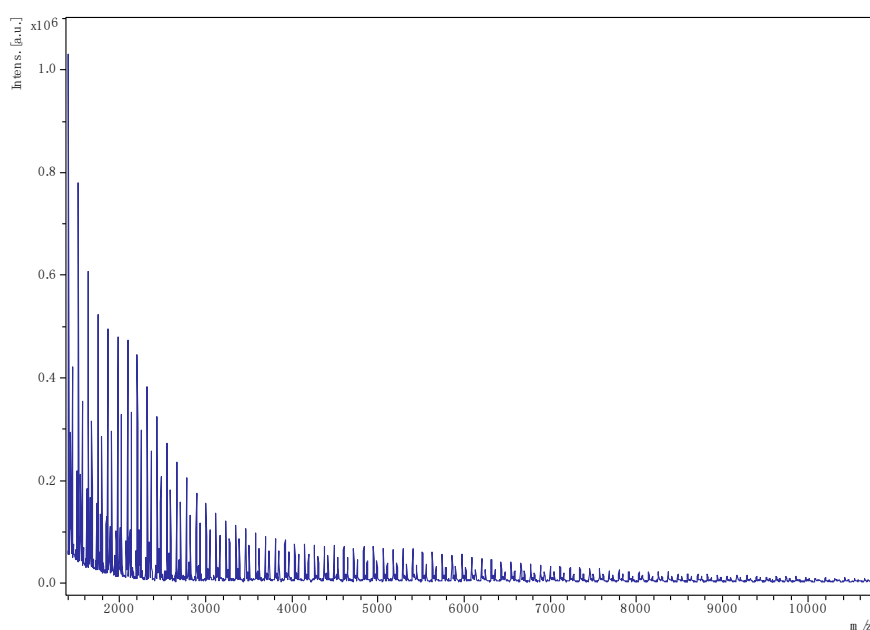

**Figure S9.** MALDI-ToF of PCL obtained using **5** under  $\text{N}_2$  as a melt (entry 7, Table 2). Present are chain polymers terminated by 2 OH [ $M = 17 \text{ (OH)} + 1 \text{ (H)} + n \times 114.14 \text{ (CL)} + 22.99 \text{ (Na}^+)$ ] (e.g. peak 1753 =  $(15 \times 114.14) + 23 + 18$ ), terminated by OH/OiPr [ $M = 59 \text{ (OC}_3\text{H}_7) + 1 \text{ (H)} + n \times 114.14 \text{ (CL)} + 22.99 \text{ (Na}^+)$ ] (e.g. peak 4648 =  $(40 \times 114.14) + 23 + 60$ ), and cyclic polymers [ $M = 22.99 \text{ (Na}^+) + n \times 114.14 \text{ (CL)}$ ] (e.g. peak 1735 =  $(15 \times 114.14) + 23$ ).

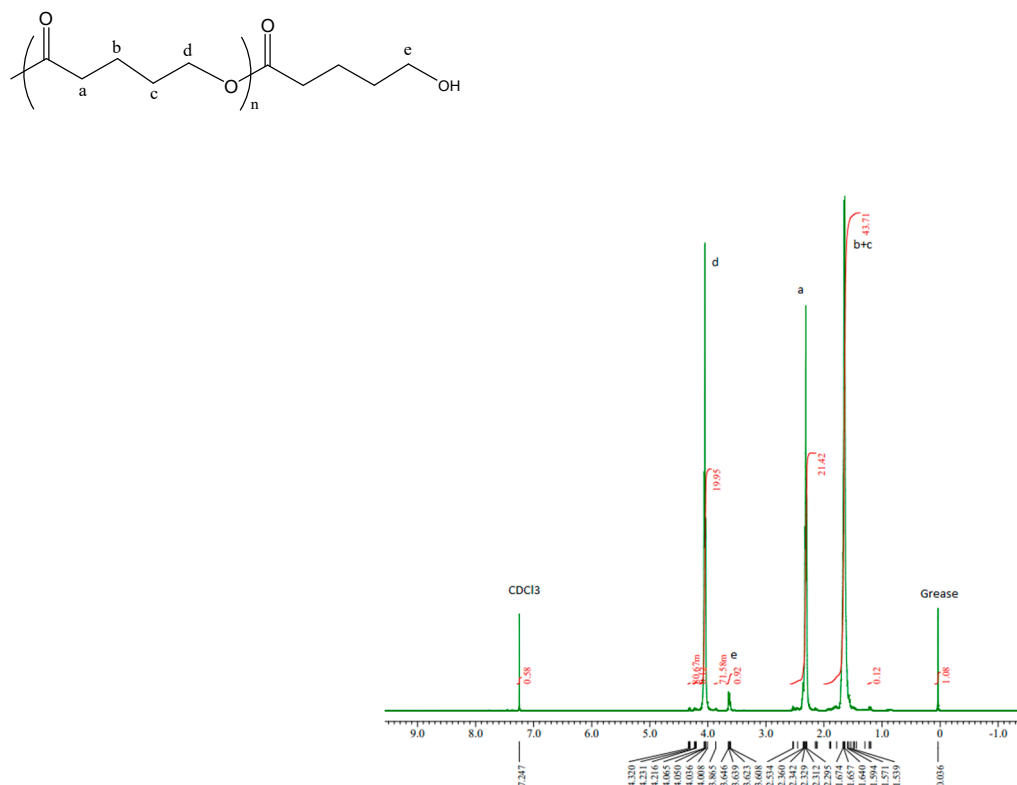

**Figure S10.**  $^1\text{H}$  NMR spectrum of PVL (using **4** under N<sub>2</sub>, entry 6, Table 3).

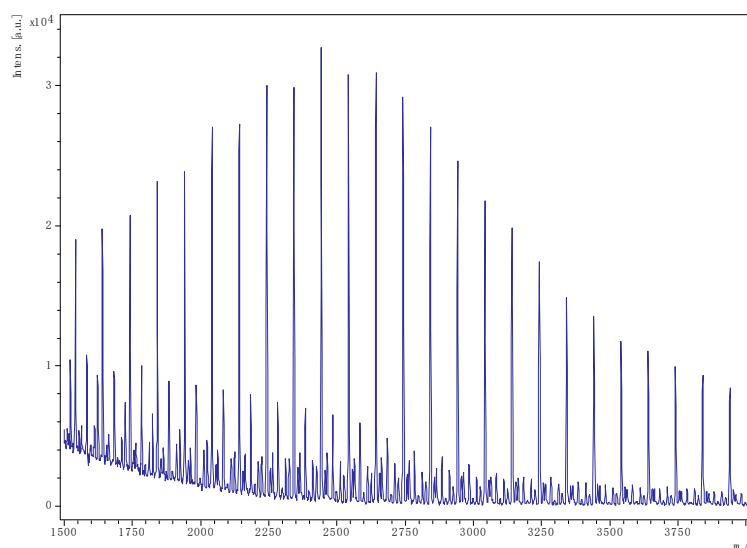

**Figure S11.** MALDI-ToF spectrum of PVL using **5** as a melt under N<sub>2</sub> (entry 8, Table 3). Present are chain polymers terminated by OH/OiPr [ $M = 59$  (OC<sub>3</sub>H<sub>7</sub>) + 1(H) +  $n \times 100.12$  (VL) + 22.99 (Na<sup>+</sup>)] (e.g. peak 2085 =  $(20 \times 100.12) + 23 + 60$ ), and cyclic polymers [ $M = 22.99$  (Na<sup>+</sup>) +  $n \times 100.12$  (VL)] (e.g. peak 1525 =  $(15 \times 100.12) + 23$ ).

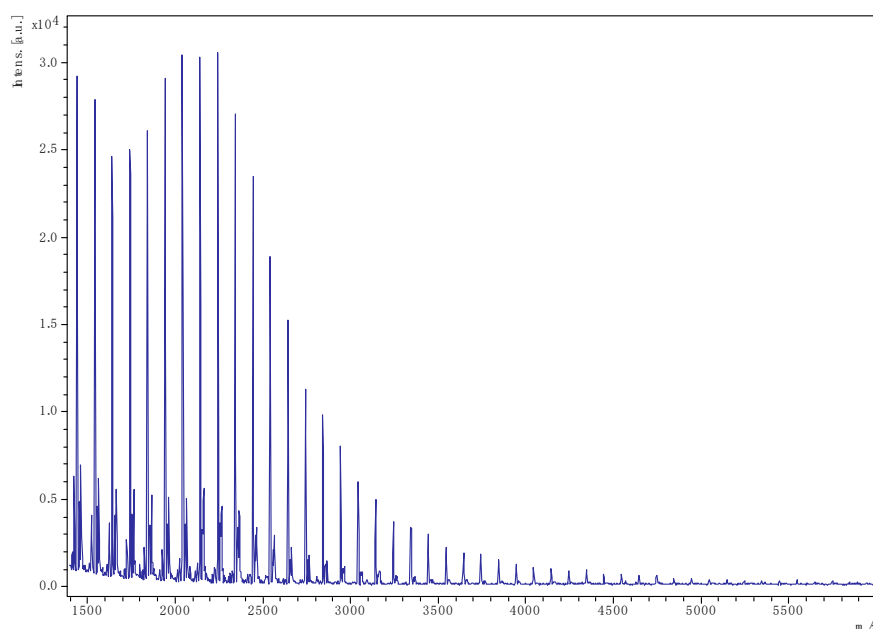

**Figure S12.** MALDI-ToF spectrum of PVL using **5** as a melt under air (entry 9, Table 3). Present are chain polymers terminated by 2 OH [ $M = 17 \text{ (OH)} + 1 \text{ (H)} + n \times 100.12 \text{ (VL)} + 22.99 \text{ (Na}^+)$ ] (e.g. peak 1543 =  $(15 \times 100.12) + 23 + 18$ ), and a smaller series assigned to cyclic polymers [ $M = 22.99 \text{ (Na}^+) + n \times 100.12 \text{ (VL)}$ ] (e.g. peak 1525 =  $(15 \times 100.12) + 23$ ).

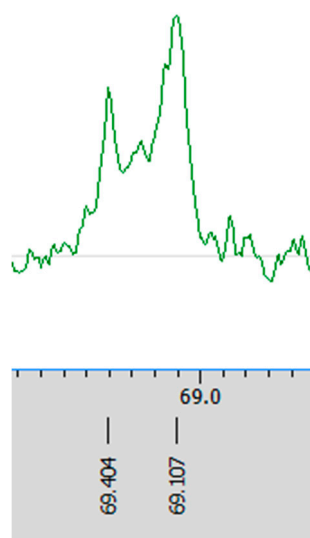

$P_i = 1 - 2I_{\text{isi}} = 0.65$

**Figure S13.**  $^{13}\text{C}$  NMR spectrum of the methine region of the PLA using **6** under  $\text{N}_2$  (entry 9, Table 4).

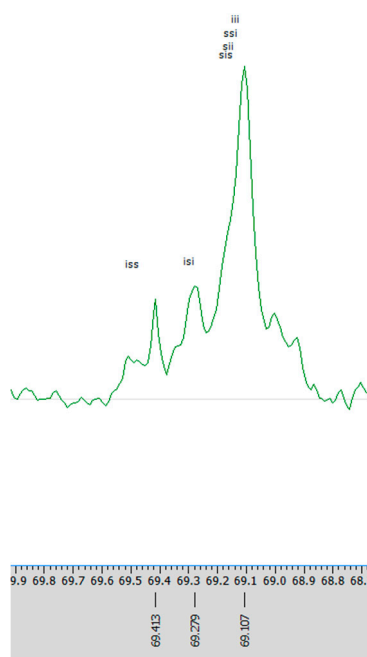

$$P_i = 1 - 2I_{isi} = 0.82$$

**Figure S14.**  $^{13}\text{C}$  NMR spectrum of the methine region of the PLA using **6** under air (entry 10, Table 4).

## References

1. G.M. Sheldrick, *Acta Cryst.* (2015), **A71**, 3–8.
2. G.M. Sheldrick, *Acta Cryst.* (2015), **C71**, 3–8
